# Supplementary material for: Imprints of Millennial-Scale Monsoonal Events during the MIS3 Revealed by Stalagmite δ13C Records in China
Source: MDPI journal article supplement (doi:10.3390/geosciences13050136), 2023-05-08
Supplement: s1 [file s1]

Archive with 1 entries (1 files):
- geosciences-2283013-supplementary.pdf
