# Supplementary material for: Imprints of Millennial-Scale Monsoonal Events during the MIS3 Revealed by Stalagmite δ13C Records in China
Source: MDPI journal article supplement (doi:10.3390/geosciences13050136), 2023-05-08
Supplement: s1 [file s1 › geosciences-2283013-supplementary.pdf]

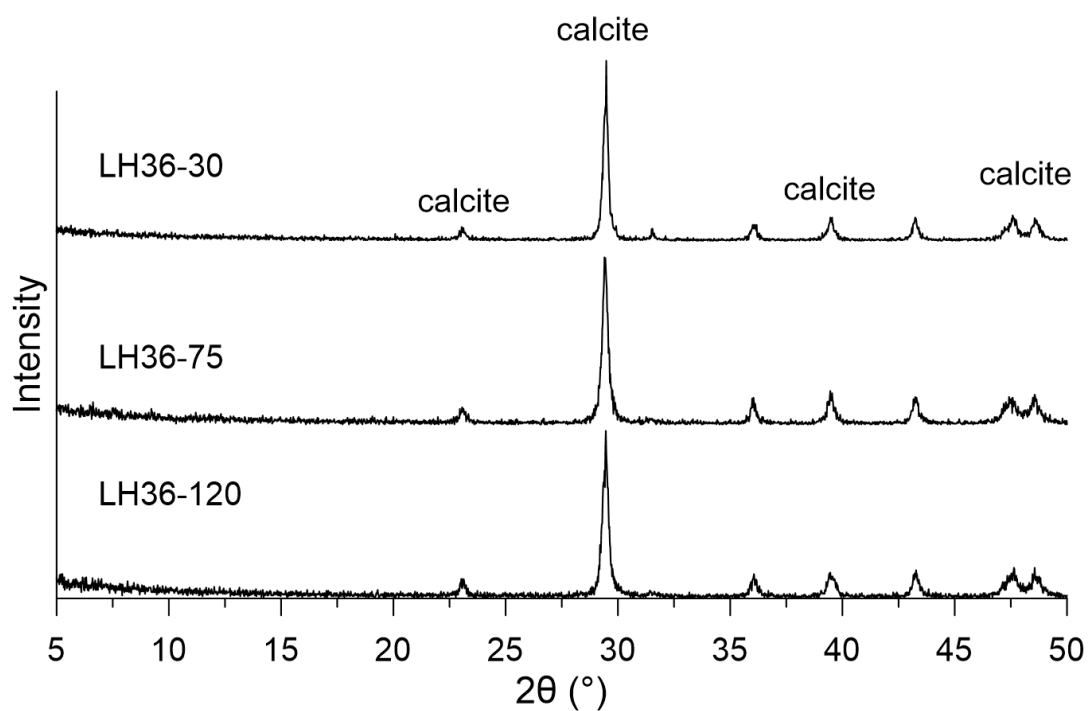

**Figure S1 X-ray diffraction results of stalagmite LH36.** We collected powder samples at depth of 30, 75 and 120 mm for X-ray diffraction to verify the calcite composition. And the results show that LH36 is composed of pure calcite.

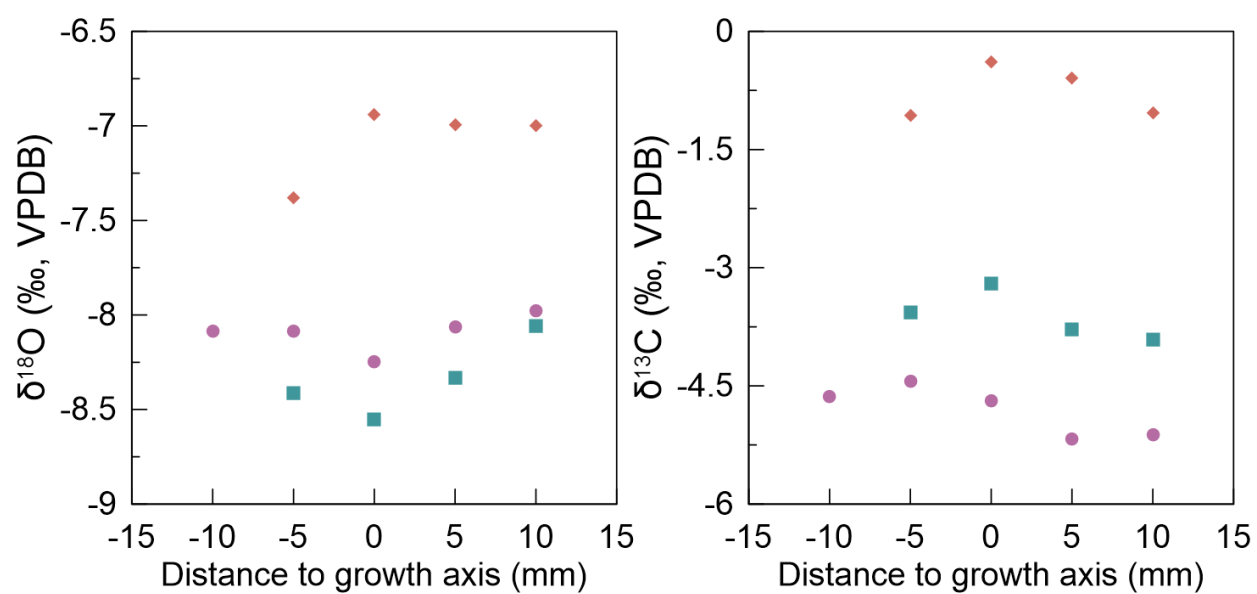

**Figure S2 Hendy test results for stalagmite LH36.** Samplings for Hendy test are collected at an interval of 5 mm. Purple circles indicate data at 158 mm, green rectangles indicate data at 146 mm and orange diamonds indicate data at 125 mm.

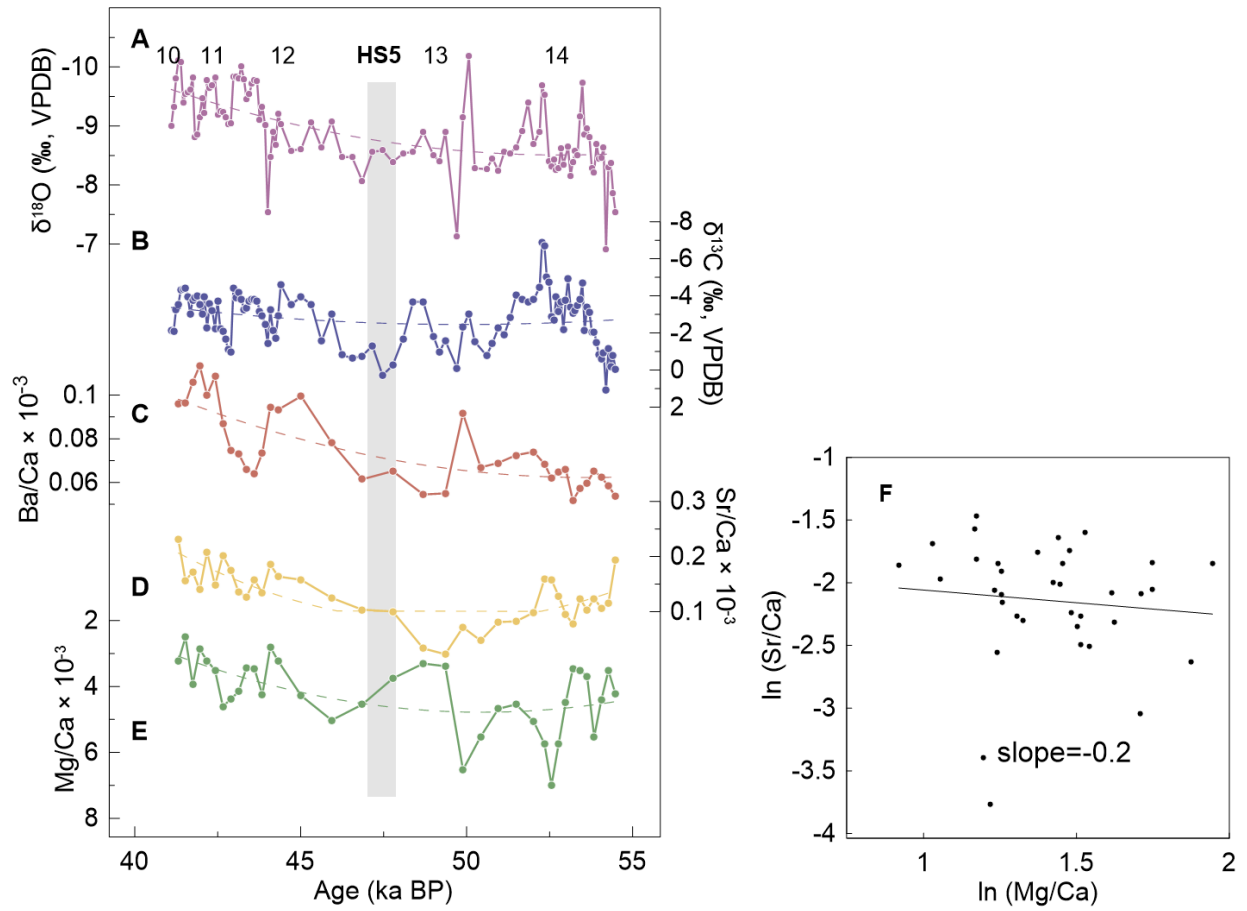

**Figure S3 Multi-proxy records (left panel, A-E) and the PCP test results (right panel, F) for stalagmite LH36.** From top to bottom are (A) LH36  $\delta^{18}\text{O}$ , (B) LH36  $\delta^{13}\text{C}$ , (C) Ba/Ca, (D) Sr/Ca and (E) Mg/Ca records. Grey shaded bars indicate HS5 event, and numbers indicate DO10 to 14 events. The slope for  $\ln(\text{Mg/Ca})$  vs.  $\ln(\text{Sr/Ca})$  is -0.2 in the right panel. This PCP test is derived according to Sinclair et al. (2012).

Table S1  $^{230}\text{Th}/\text{U}$  dating results for stalagmite LH36 from Lianhua Cave

| Sample ID | $^{238}\text{U}$<br>(ppb) | $^{232}\text{Th}$<br>(ppt) | $\delta^{234}\text{U}$<br>(measured) | $^{230}\text{Th}/^{238}\text{U}$<br>(activity) | $^{230}\text{Th}/^{232}\text{Th}$<br>atomic ( $\times 10^{-3}$ ) | Age (ka)<br>(uncorrected) | Age (ka)<br>(corrected) | Age (ka BP)<br>(relative to 1950 AD) | $\delta^{234}\text{U}$<br>(initial) |
|-----------|---------------------------|----------------------------|--------------------------------------|------------------------------------------------|------------------------------------------------------------------|---------------------------|-------------------------|--------------------------------------|-------------------------------------|
| LH36-33   | 233.4 $\pm$ 0.3           | 281.0 $\pm$ 6.0            | 1922 $\pm$ 3                         | 0.822 $\pm$ 0.002                              | 11.258 $\pm$ 0.240                                               | 34.73 $\pm$ 0.10          | 34.72 $\pm$ 0.10        | 34.64 $\pm$ 0.10                     | 2120 $\pm$ 3                        |
| LH36-37   | 161.9 $\pm$ 0.1           | 2600.0 $\pm$ 20.0          | 1571 $\pm$ 2                         | 0.839 $\pm$ 0.002                              | 0.861 $\pm$ 0.008                                                | 41.20 $\pm$ 0.10          | 41.10 $\pm$ 0.10        | 41.08 $\pm$ 0.14                     | 1765 $\pm$ 3                        |
| LH36-51   | 97.5 $\pm$ 0.1            | 2088.5 $\pm$ 6.8           | 1474 $\pm$ 3                         | 0.825 $\pm$ 0.003                              | 0.635 $\pm$ 0.003                                                | 42.41 $\pm$ 0.20          | 42.20 $\pm$ 0.23        | 42.13 $\pm$ 0.23                     | 1660 $\pm$ 3                        |
| LH36-80   | 95.6 $\pm$ 0.1            | 8014.6 $\pm$ 30.1          | 1630 $\pm$ 3                         | 0.928 $\pm$ 0.006                              | 0.183 $\pm$ 0.001                                                | 45.30 $\pm$ 0.36          | 44.52 $\pm$ 0.53        | 44.44 $\pm$ 0.53                     | 1849 $\pm$ 4                        |
| LH36-95   | 102.6 $\pm$ 0.1           | 11506.8 $\pm$ 53.9         | 1196 $\pm$ 3                         | 0.842 $\pm$ 0.006                              | 0.124 $\pm$ 0.001                                                | 50.31 $\pm$ 0.46          | 49.06 $\pm$ 0.78        | 48.99 $\pm$ 0.78                     | 1373 $\pm$ 5                        |
| LH36-113  | 156.9 $\pm$ 0.2           | 8096.9 $\pm$ 27.0          | 2478 $\pm$ 4                         | 1.400 $\pm$ 0.007                              | 0.447 $\pm$ 0.003                                                | 52.66 $\pm$ 0.31          | 52.31 $\pm$ 0.36        | 52.23 $\pm$ 0.36                     | 2873 $\pm$ 6                        |
| LH36-127  | 140.9 $\pm$ 0.2           | 11597.0 $\pm$ 59.6         | 1500 $\pm$ 3                         | 1.021 $\pm$ 0.007                              | 0.205 $\pm$ 0.002                                                | 54.11 $\pm$ 0.46          | 53.31 $\pm$ 0.60        | 53.24 $\pm$ 0.60                     | 1743 $\pm$ 5                        |
| LH36-147  | 256.9 $\pm$ 0.3           | 10714.7 $\pm$ 42.4         | 991 $\pm$ 3                          | 0.899 $\pm$ 0.005                              | 0.356 $\pm$ 0.002                                                | 61.97 $\pm$ 0.44          | 61.46 $\pm$ 0.51        | 61.39 $\pm$ 0.51                     | 1179 $\pm$ 4                        |

\*  $\delta^{234}\text{U} = ([^{234}\text{U}/^{238}\text{U}]_{\text{activity}} - 1) \times 1000$ .

\*\*  $\delta^{234}\text{U}_{\text{initial}}$  was calculated based on  $^{230}\text{Th}$  age (T), i.e.  $\delta^{234}\text{U}_{\text{initial}} = \delta^{234}\text{U}_{\text{measured}} \times e^{\lambda_{234}T}$ . U decay constants:  $\lambda_{238} = 1.55125 \times 10^{-10} \text{ yr}^{-1}$  (Jaffey et al., 1971) and  $\lambda_{234} = 2.82206 \times 10^{-6} \text{ yr}^{-1}$  (Cheng et al., 2013). Th decay constant:  $\lambda_{230} = 9.1705 \times 10^{-6} \text{ yr}^{-1}$  (Cheng et al., 2013).

\*\*\* Corrected  $^{230}\text{Th}$  ages assume the initial  $^{230}\text{Th}/^{232}\text{Th}$  atomic ratio of  $(4.4 \pm 2.2) \times 10^{-6}$ . Those are the values for a material at secular equilibrium, with the bulk earth  $^{232}\text{Th}/^{238}\text{U}$  value of 3.8. Errors are  $2\sigma$  analytical errors. All ages are corrected to ‘present’ which is defined as the year 1950 AD.

Table S2 Pearson correlation coefficients for LH36 proxies ( $p < 0.01$ ). For trace metal ratios,  $n=36$ ; for trace metal ratios and stable isotopes,  $n=36$ ; for stable isotopes,  $n=107$ .

|                       | $\delta^{18}\text{O}$ | $\delta^{13}\text{C}$ | Mg/Ca | Sr/Ca | Ba/Ca |
|-----------------------|-----------------------|-----------------------|-------|-------|-------|
| $\delta^{18}\text{O}$ |                       | 0.59                  | 0.32  | -0.35 | -0.54 |
| $\delta^{13}\text{C}$ | 0.59                  |                       | 0     | -0.07 | -0.23 |
| Mg/Ca                 | 0.32                  | 0                     |       | -0.18 | -0.25 |
| Sr/Ca                 | -0.35                 | -0.07                 | -0.18 |       | 0.53  |
| Ba/Ca                 | -0.54                 | -0.23                 | -0.25 | 0.53  |       |

## References

- Cheng, H., Edwards, R.L., Shen, C., Polyak, V.J., Asmerom, Y., Woodhead, J., Hellstrom, J., Wang, Y., Kong, X., Spötl, C., 2013. Improvements in  $^{230}\text{Th}$  dating,  $^{230}\text{Th}$  and  $^{234}\text{U}$  half-life values, and U-Th isotopic measurements by multicollector inductively coupled plasma mass spectrometry. *Earth Planet. Sci. Lett.* 371, 82-91.
- Jaffey, A.H., Flynn, K.F., Glendenin, L.E., Bentley, W.C., Essling, A.M., 1971. Precision measurement of half-lives and specific activities of  $^{235}\text{U}$  and  $^{238}\text{U}$ . *Phys. Rev. C* 4, 1889-1906.
- Sinclair, D.J., Banner, J. L., Taylor, F.W., Partin, J., Jenson, J., Mylroie, J., Goddard, E. Magnesium and strontium systematics in tropical speleothems from the Western Pacific. *Chem. Geol.* 2012. 294–295, 1–17.
